# Supplementary material for: Over-expression of EGFR regulated by RARA contributes to 5-FU resistance in colon cancer
Source: publisher site journal article supplement (doi:10.18632/aging.102607), 2020-01-02
Supplement: Supplementary file [file aging-v12i1-102607-supplementary-material-SD1.pdf]

SUPPLEMENTARY FIGURES

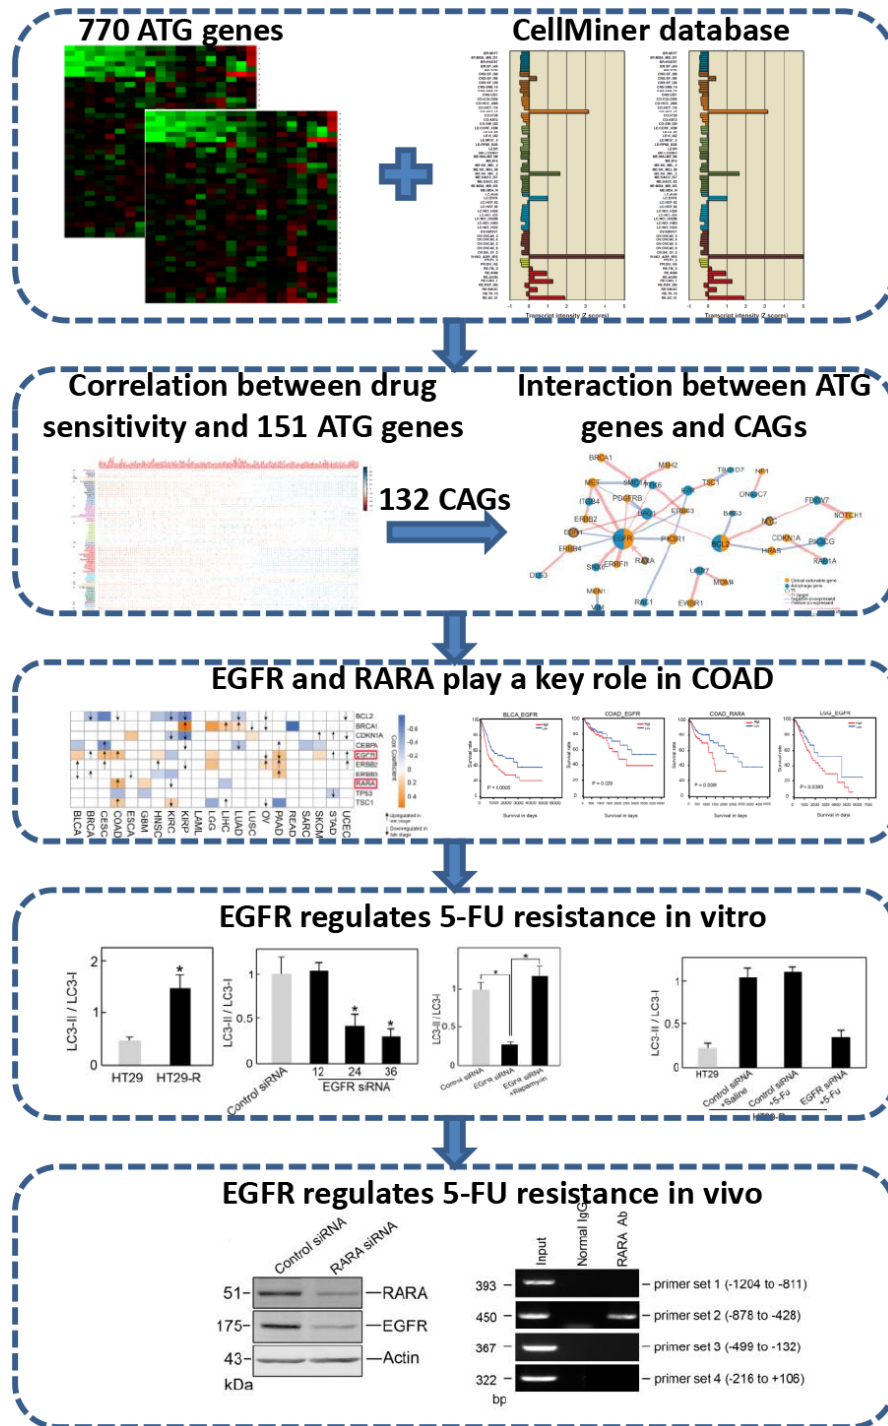

Supplementary Figure 1. The sketch map of this study.

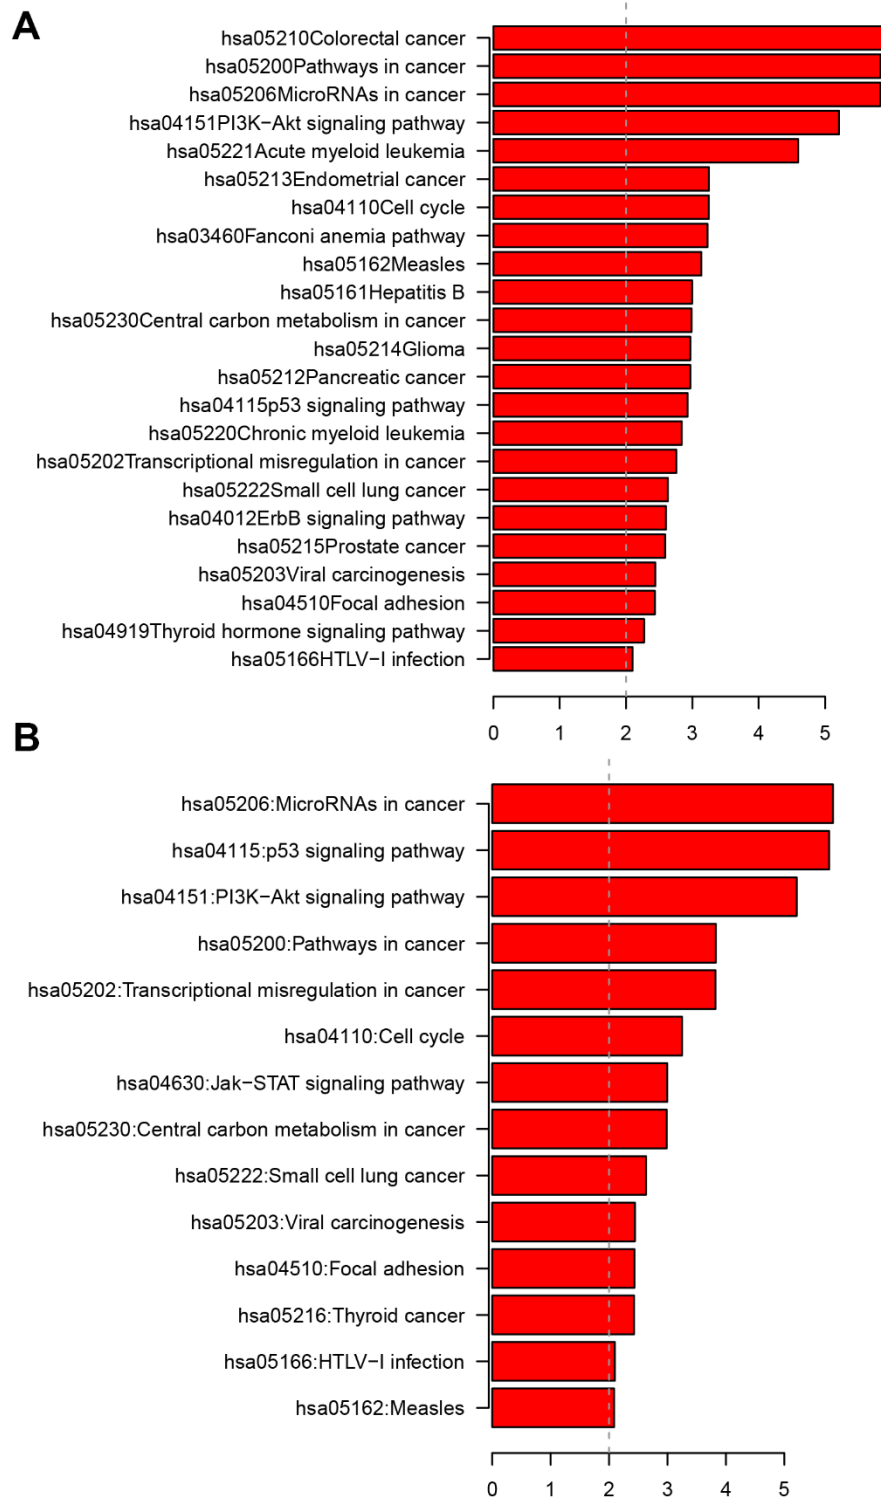

**Supplementary Figure 2.** Pathway enrichment analysis of significantly correlated genes of (A) CDC42BPB and (B) KIF21B.

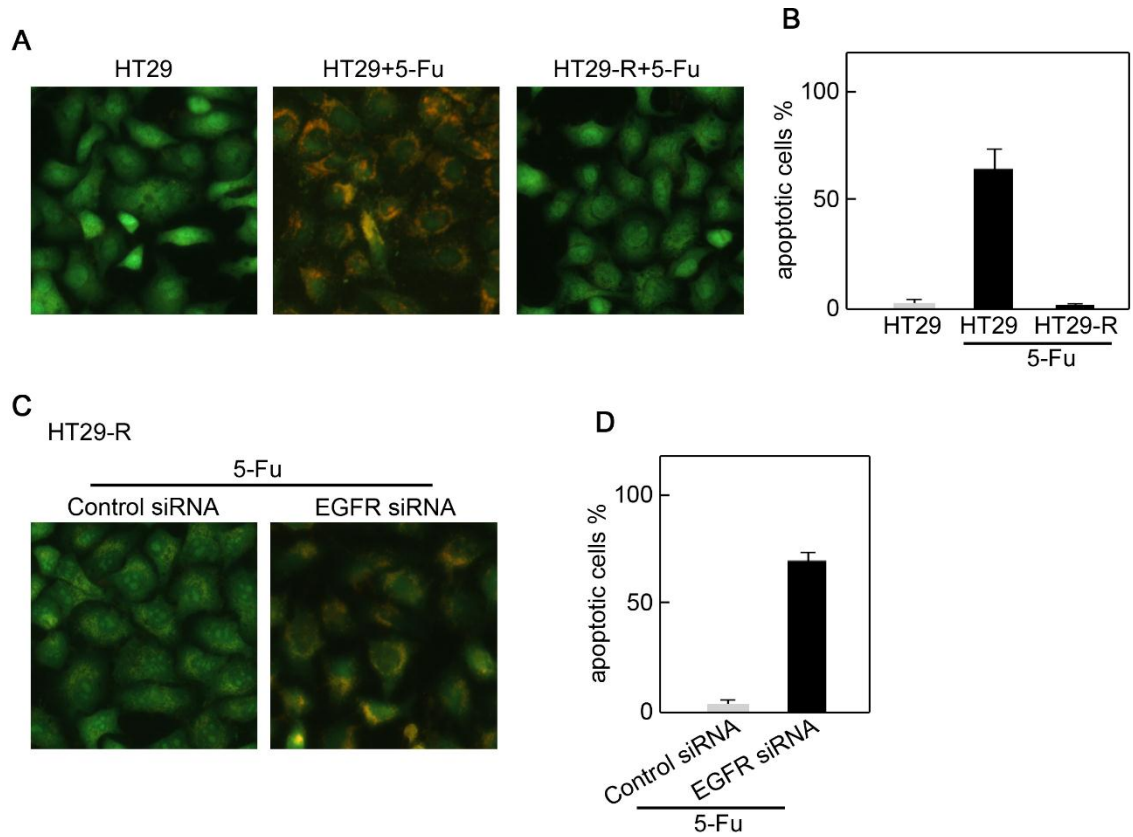

**Supplementary Figure 3. Silencing of EGFR increased the anticancer effect of 5-FU in HT29-R cells.** (A) AO/EB staining showed that HT29-R cells were insensitive to 5-FU treatment. (B) The proportion of apoptotic cells analyzed from A. (C) Silencing of EGFR increased the anticancer effect of 5-FU in HT29-R cells. (D) The proportion of apoptotic cells analyzed from (C).

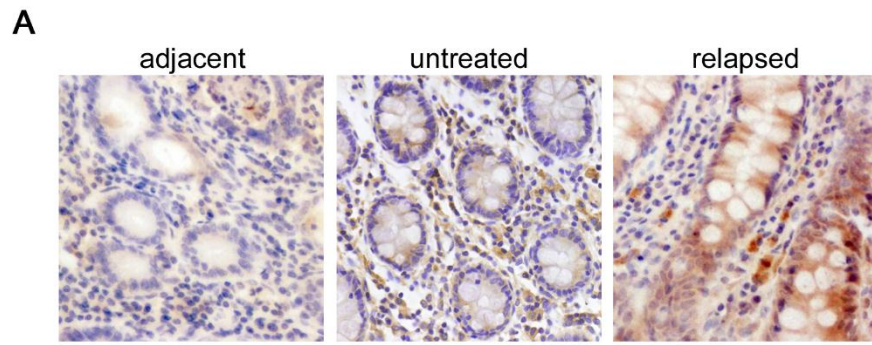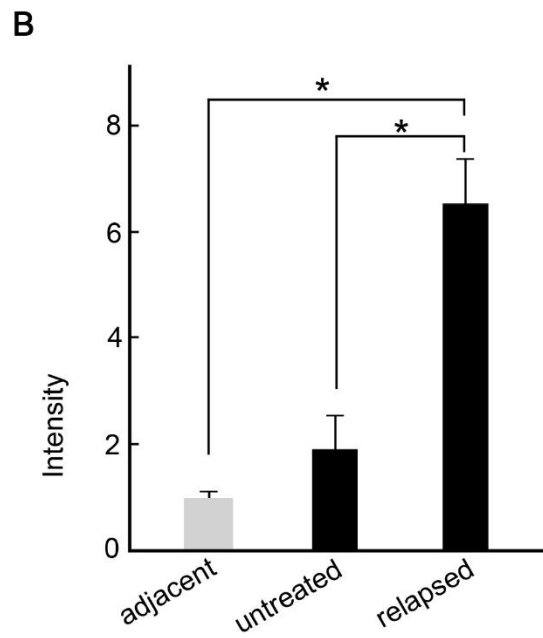

**Supplementary Figure 4. EGFR was overexpressed in relapsed colon cancer tissues.** (A) EGFR expression was determined by immunohistochemical staining. Adjacent: adjacent tissue; untreated: primary colon cancer without any treatment; relapsed: relapsed colon cancer after 5-FU treatment. (B) The positive staining intensity was assessed from A.

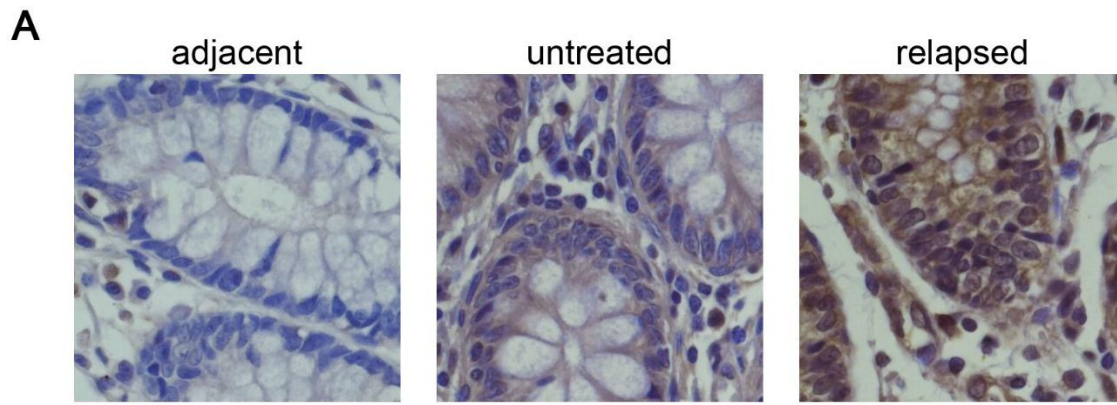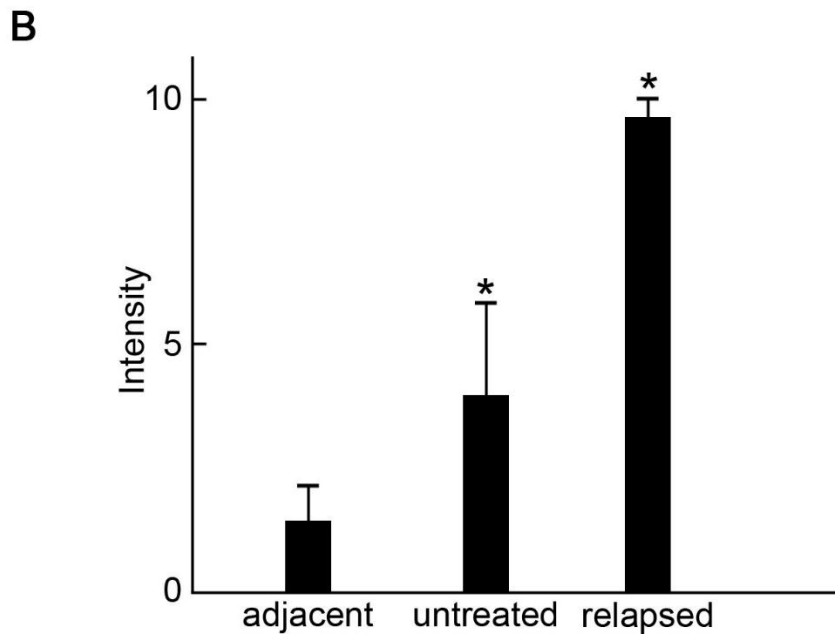

**Supplementary Figure 5. p62 was decreased in relapsed colon cancer tissues.** (A) p62 expression was determined by immunohistochemical staining. Adjacent: adjacent tissue; untreated: primary colon cancer without any treatment; relapsed: relapsed colon cancer after 5-FU treatment. (B) The positive staining intensity was assessed from (A).
